# Supplementary material for: Optically controlled large-coercivity room-temperature thin-film magnets
Source: Royal Society of Chemistry journal article supplement (doi:10.1039/d1tc05100h), 2021-11-25
Supplement: d1tc05100h1.pdf [file d1tc05100h1.pdf]

# Optically controlled large-coercivity room-temperature thin-film magnets

Anish Philip<sup>a</sup>, Yifan Zhou<sup>b</sup>, Girish C Tewari<sup>a</sup>, Sebastiaan van Dijken<sup>b</sup>, and Maarit Karppinen<sup>a\*</sup>

<sup>a</sup>Department of Chemistry and Materials Science, Aalto University, FI-00076 Espoo, Finland

<sup>b</sup>NanoSpin, Department of Applied Physics, Aalto University, FI-00076 Aalto, Finland

Supporting Information

Table S1. Summary of  $[(\text{FeCl}_3+\text{H}_2\text{O})_m+(\text{FeCl}_3+\text{AZO})]_n+(\text{FeCl}_3+\text{H}_2\text{O})_m$  films studied: film thickness values were determined by XRR for films with fewer molecular layers ( $n < 10$ ); for the films with  $n \geq 10$ , the film thickness value [given in brackets] is an estimate based on the number of ALD/MLD cycles applied.

| Sample       | n   | m   | Total number of ALD/MLD cycles [(n × m) + m] | Total film thickness (nm) | Individual $\epsilon\text{-Fe}_2\text{O}_3$ -layer thickness (nm) |
|--------------|-----|-----|----------------------------------------------|---------------------------|-------------------------------------------------------------------|
| n=0 (50 nm)  | 0   | 810 | 810                                          | 50                        | 50.0                                                              |
| n=2 (19 nm)  | 2   | 300 | 902                                          | 56.6                      | 18.6                                                              |
| n=3 (19 nm)  | 3   | 300 | 1203                                         | 75.1                      | 18.6                                                              |
| n=4 (15 nm)  | 4   | 250 | 1254                                         | 85.0                      | 15.5                                                              |
| n=6 (15 nm)  | 6   | 250 | 1756                                         | 105.7                     | 15.5                                                              |
| n=8 (15 nm)  | 8   | 250 | 2258                                         | 131.4                     | 15.5                                                              |
| n=10 (15 nm) | 10  | 250 | 2760                                         | [171]                     | 15.5                                                              |
| n=10 (3 nm)  | 10  | 50  | 560                                          | [34.7]                    | 3.1                                                               |
| n=15 (12 nm) | 15  | 200 | 3215                                         | [199]                     | 12.4                                                              |
| n=20 (9 nm)  | 20  | 150 | 3170                                         | [197]                     | 9.3                                                               |
| n=25 (3 nm)  | 25  | 50  | 1325                                         | [82.2]                    | 3.1                                                               |
| n=60 (2 nm)  | 60  | 32  | 1952                                         | [121]                     | 2.0                                                               |
| n=100 (1 nm) | 100 | 17  | 1717                                         | [106]                     | 1.05                                                              |

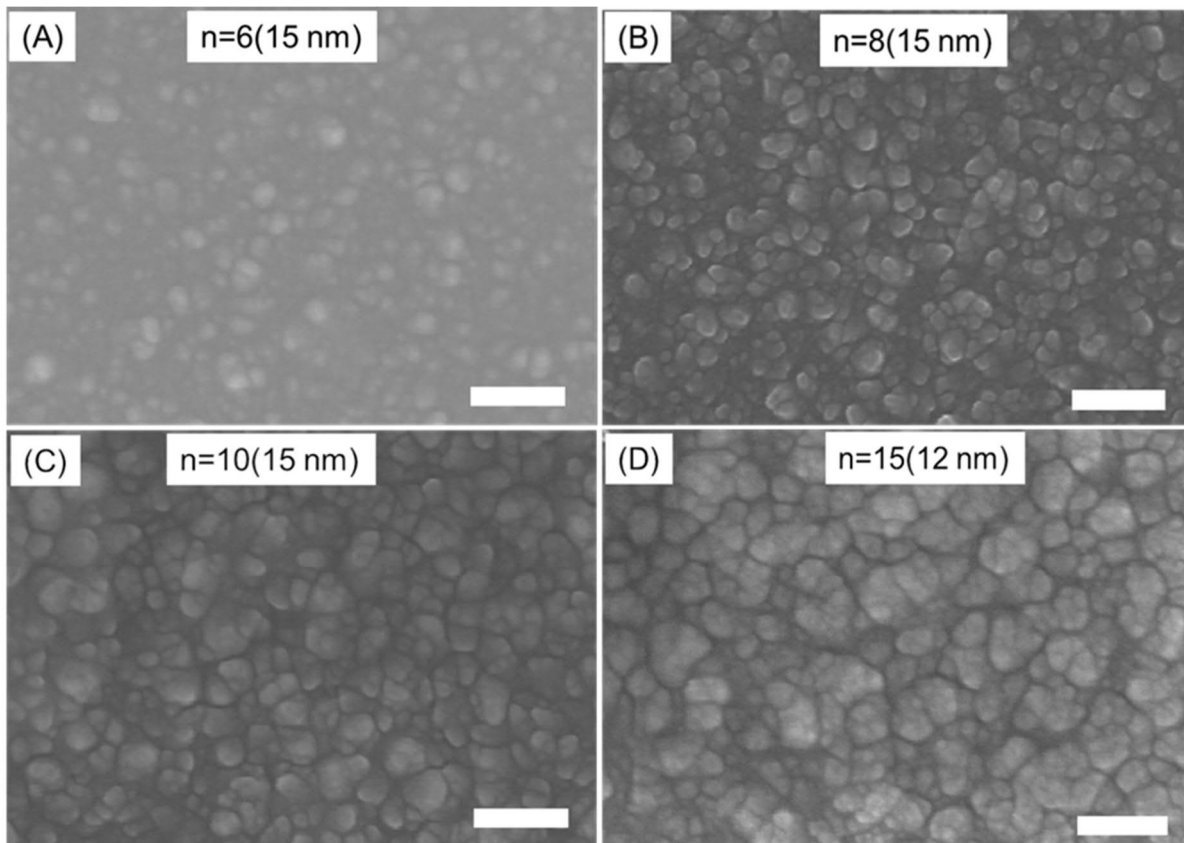

Figure S1. Top-view SEM images for representative  $\epsilon$ - $\text{Fe}_2\text{O}_3$ :azobenzene SL films; sample name indicates both the number of azobenzene layers (n) and the individual  $\epsilon$ - $\text{Fe}_2\text{O}_3$ -layer thickness (in parentheses). Each scale bar is 250 nm.

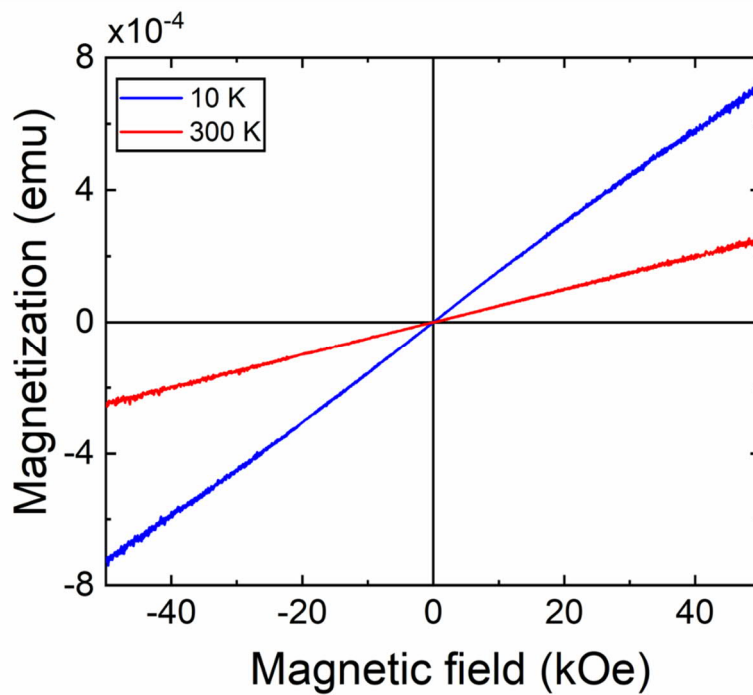

Figure S2. Magnetization versus magnetic field isotherms measured at various temperatures for ca. 200 nm thick Fe-azobenzene film grown from  $\text{FeCl}_3$  and AZO; the linear M-H curve shape confirms the paramagnetic behaviour.

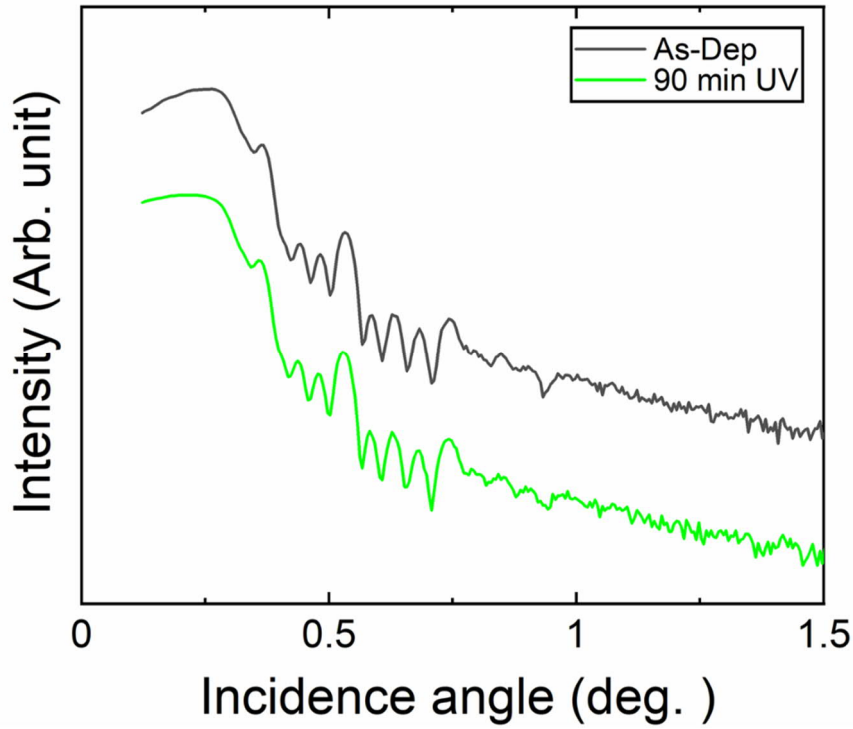

Figure S3. Effect of UV irradiation on the structural properties of  $\epsilon$ -Fe<sub>2</sub>O<sub>3</sub>:azobenzene SL films. XRR data for n=3 (19 nm) film before and after 90-min UV irradiation (365 nm); no significance changes in the SL structure are seen.

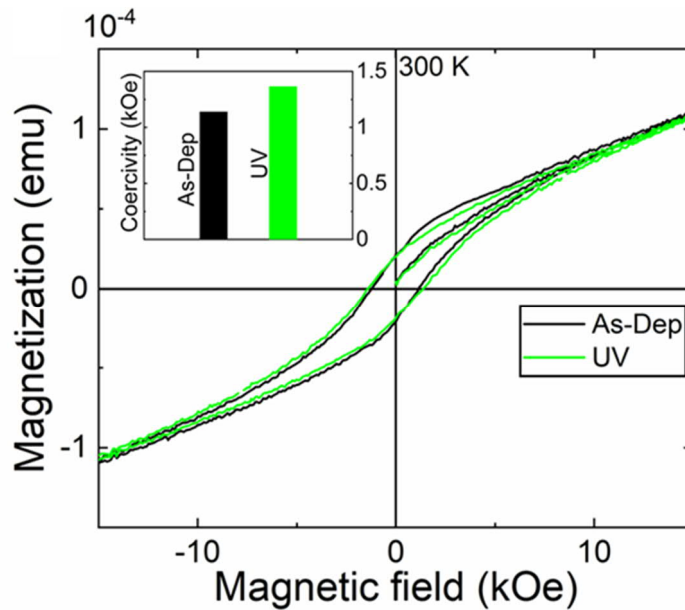

Figure S4. M-H curves for the n=100 (1 nm) SL film before and after UV (20 min) irradiation; the inset shows the changes in coercivity with the irradiation.

Table S2. Coercivity and remnant magnetization values for two representative samples,  $n=60$  (2 nm) and  $n=100$  (1 nm), taken from the measured raw data without the diamagnetic background (substrate) signal subtraction; the coercivity values in parentheses are the corresponding values after the subtraction.

| Sample         | Treatment         | Coercivity [Oe];<br>(value after substrate subtraction) | Remnant magnetization<br>[ $\times 10^{-5}$ emu] |
|----------------|-------------------|---------------------------------------------------------|--------------------------------------------------|
| $n=60$ (2 nm)  | As-deposited      | 1266 (970)                                              | 1.88                                             |
|                | UV-irradiated     | 1358 (1060)                                             | 1.94                                             |
|                | UV-Vis-irradiated | 1282 (990)                                              | 1.86                                             |
| $n=100$ (1 nm) | As-deposited      | 1631 (1140)                                             | 2.18                                             |
|                | UV-irradiated     | 2058 (1365)                                             | 2.25                                             |

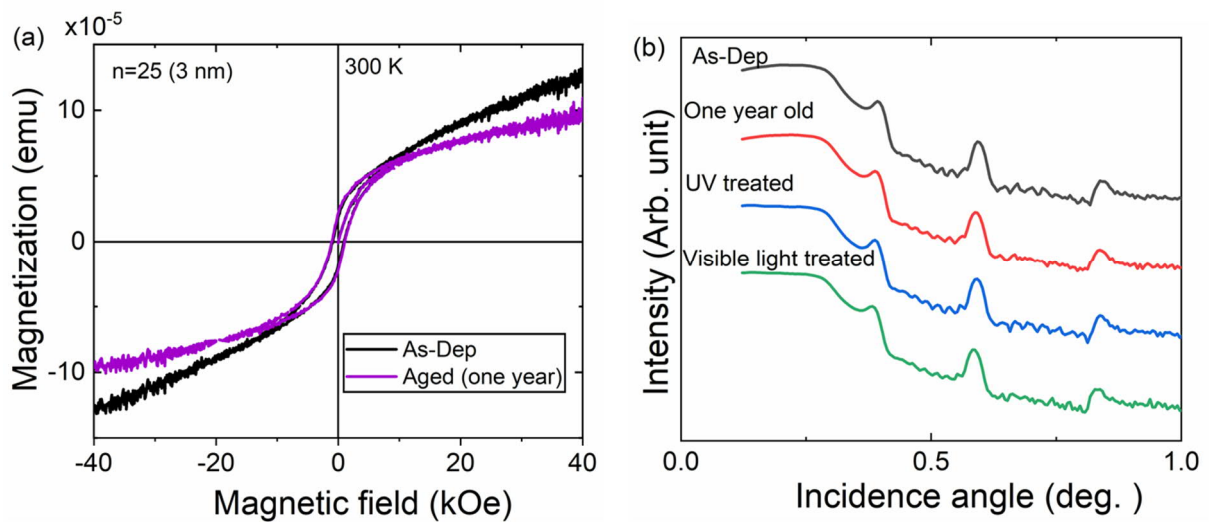

Figure S5. Effect of aging on the magnetic and structural properties of  $\epsilon\text{-Fe}_2\text{O}_3\text{:azobenzene}$  SL films. (a) M-H curves for as-deposited and one-year aged  $n=25$  (3 nm) film. (b) XRR patterns for as-deposited and aged  $n=8$  (15 nm) film, and also for the same film after 120 min UV irradiation followed by 120 min visible light irradiation; no significance changes seen.
